# Supplementary material
Source: PubMed Central journal article supplement (PMC6102715)

# FM+controls

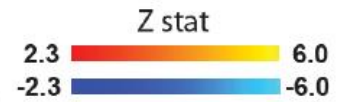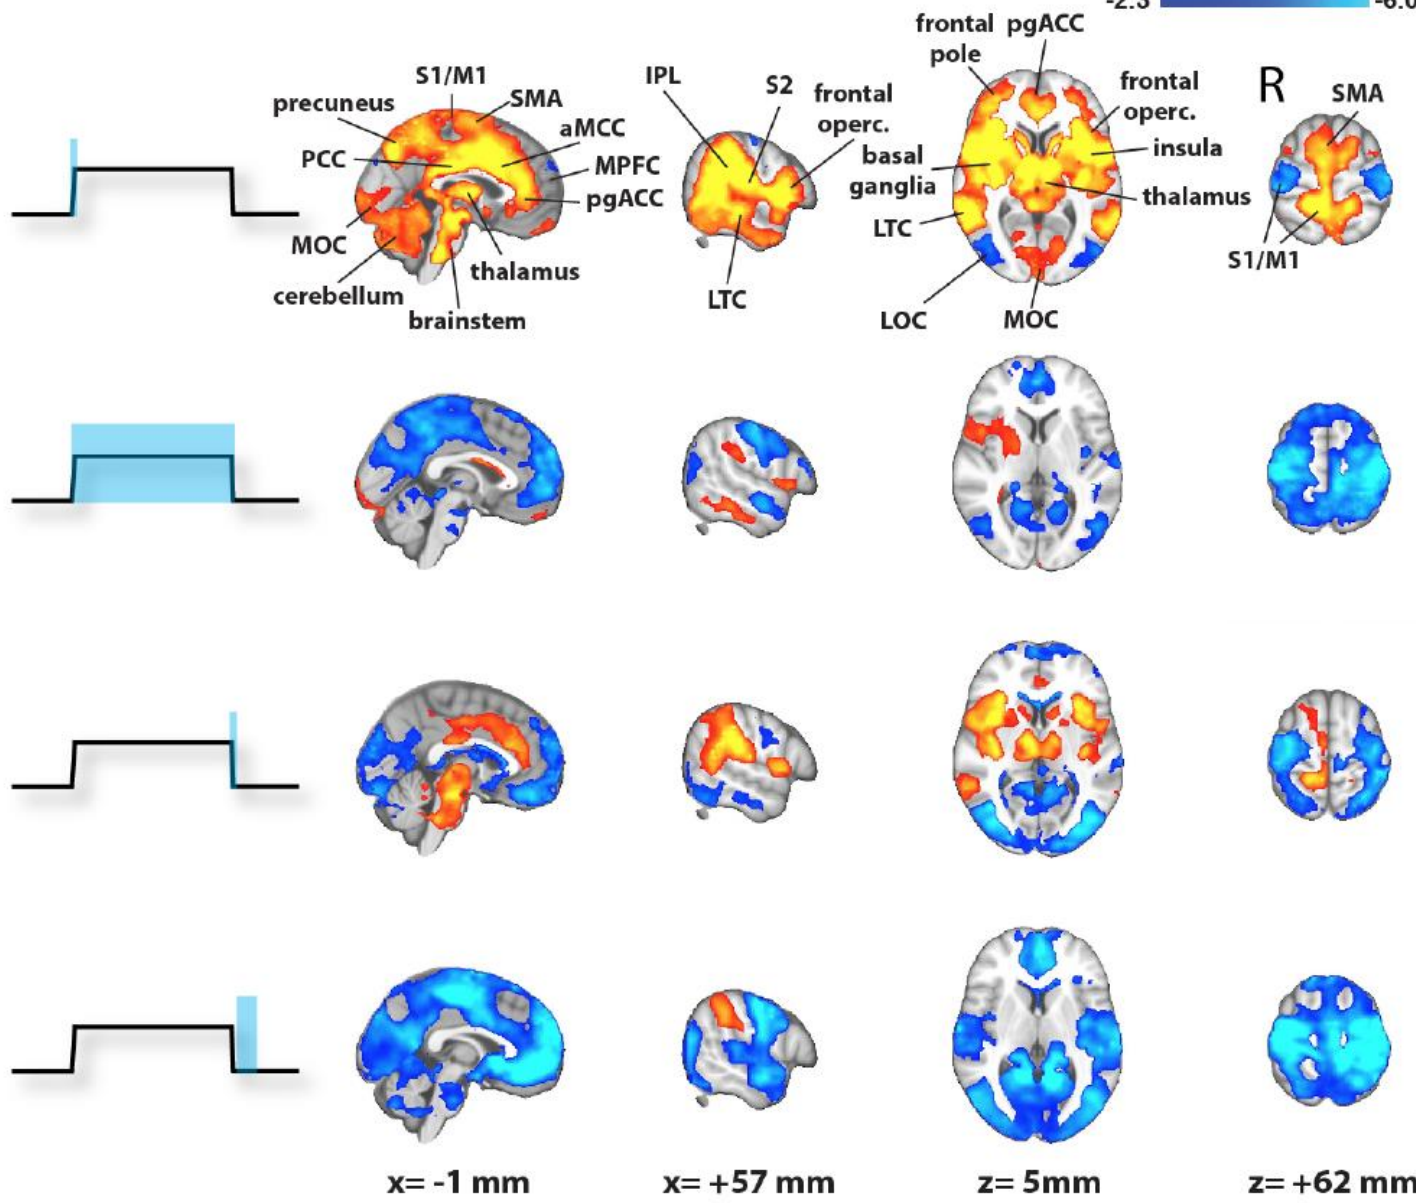

Supplement: NIHMS970242-supplement-Supplementary_Figure.pdf [file NIHMS970242-supplement-Supplementary_Figure.pdf]
